# Supplementary material for: Boosting photocatalytic performance of CdxZn1–xS for H2 production by Mo2C MXene with large interlayer distance
Source: Royal Society of Chemistry journal article supplement (doi:10.1039/d3ta00435j), 2023-01-01
Supplement: d3ta00435j1.pdf [file d3ta00435j1.pdf]

## Electronic Supplementary Information

### **Boosting photocatalytic performance of $\text{Cd}_x\text{Zn}_{1-x}\text{S}$ for $\text{H}_2$ production by $\text{Mo}_2\text{C}$ MXene with large interlayer distance**

Sen Jin,<sup>a</sup> Jiabin Wu,<sup>b</sup> Jizhou Jiang,<sup>c</sup> Ruige Wang,<sup>a</sup> Bingxin Zhou,<sup>a</sup> Libo Wang,<sup>a</sup>

Qianku Hu<sup>a</sup> and Aiguo Zhou<sup>\*a</sup>

<sup>a</sup>School of Materials Science and Engineering, Henan Polytechnic University, Jiaozuo, Henan 454003, China

<sup>b</sup>Department of Chemistry, Tsinghua University, Beijing 100084, China

<sup>c</sup>School of Environmental Ecology and Biological Engineering, Key Laboratory of Green Chemical Engineering Process of Ministry of Education, Engineering Research Center of Phosphorus Resources Development and Utilization of Ministry of Education, Wuhan Institute of Technology, Wuhan 430205, Hubei, China

\*Corresponding author:

Aiguo Zhou, zhouag@hpu.edu.cn

## Experiment S1

### Determination of the optimal ratio of Cd and Zn in $\text{Cd}_x\text{Zn}_{1-x}\text{S}$ solid solution.

4 mmol of  $\text{Cd}(\text{NO}_3)_2 \cdot 4\text{H}_2\text{O}$  (Macklin, Shanghai, China, AR 99%) and  $\text{Zn}(\text{NO}_3)_2 \cdot 6\text{H}_2\text{O}$  (Fengchuan Chemical Reagent Technology Co., LTD, Tianjin, China, AR 99%) was dissolved in 20 mL de-ionized water to form mixed cadmium and zinc source solution. Then 4 mmol of  $(\text{NH}_4)_2\text{S}$  (Aladdin, Shanghai, China, AR 20% in  $\text{H}_2\text{O}$ ) solution was diluted in 20 mL de-ionized water to provide sulfur source. Thereafter, the  $(\text{NH}_4)_2\text{S}$  aqueous solution was added dropwise into the above mixed solution with stirring at room temperature. After 1 h chemical reaction, the precipitate was centrifuged and washed by de-ionized water and ethanol until  $\text{pH} \approx 7$ , followed by drying in vacuum at  $60^\circ\text{C}$  overnight. At last, the block samples with different color were added successively in a mortar and grinded thoroughly using a pestle until a homogenous powder. According to molar ratio of Cd and Zn, the amount of  $\text{Cd}(\text{NO}_3)_2$  and  $\text{Zn}(\text{NO}_3)_2$  is based on the formula of  $\text{Cd}_x\text{Zn}_{1-x}\text{S}$  ( $x = 0.1, 0.2, 0.3, \dots, 0.9$ ), and the corresponding CZS samples were labeled as  $\text{Cd}_{0.1}\text{Zn}_{0.9}\text{S}$ ,  $\text{Cd}_{0.2}\text{Zn}_{0.8}\text{S}$ ,  $\text{Cd}_{0.3}\text{Zn}_{0.7}\text{S}$ ,  $\text{Cd}_{0.4}\text{Zn}_{0.6}\text{S}$ ,  $\text{Cd}_{0.5}\text{Zn}_{0.5}\text{S}$ ,  $\text{Cd}_{0.6}\text{Zn}_{0.4}\text{S}$ ,  $\text{Cd}_{0.7}\text{Zn}_{0.3}\text{S}$ ,  $\text{Cd}_{0.8}\text{Zn}_{0.2}\text{S}$  and  $\text{Cd}_{0.9}\text{Zn}_{0.1}\text{S}$ .

## Experiment S2

### Physicochemical characterizations.

The component of all the samples were tested by X-ray diffraction (XRD; Smartlab, Rigaku Corporation, Japan) using Cu-K $\alpha$  ( $\lambda = 1.5406 \text{ \AA}$ ) radiation at a scan rate of  $0.02 2\theta \text{ s}^{-1}$ . The microstructures were observed by scanning electron microscopy (SEM; Merlin Compact, Zeiss, Germany) equipped with an energy disperse spectroscope (EDS; X-MaxN, Oxford, UK) and transmission electron microscope (TEM, 2100F, JEM, Japan) with an accelerating voltage of 200 kV. The powder size distribution was tested by a particle size analyzer via wet process (Mastersizer 3000, Malvern, UK). The surface chemical element composition and chemical states of the samples were characterized by an X-ray photoelectron spectrometer (XPS, ESCALAB 250X, ThermoFischer, USA). The spectra were excited by Al K $\alpha$  source ( $h\nu = 1486.6 \text{ eV}$ , operated at 12.5 kV with heater current of 16 mA) with a passing-energy of 100 eV for survey spectra and 20 eV for high-resolution spectra at a step size of 0.05 eV. The Brunauer-Emmett-Teller (BET) specific surface area (SSA) of the samples were investigated by N $_2$  adsorption-desorption at 77 K using a Micromeritics ASAP2460 adsorption analyzer and the SSA was determined by a multipoint BET method utilizing the adsorption data in the range of relative pressure ( $P/P_0$ ) of 0.05-0.3. All the samples were pretreated by degassing at 80°C in vacuum before N $_2$  adsorption measurements. The ultraviolet-visible (UV-Vis) diffuse reflectance spectra were tested by dry-pressing disk samples with an ultraviolet-visible spectrophotometer (UH4150, Hitachi, Japan) and using BaSO $_4$  as the reflectance standard in the spectral range of 200-800 nm. The photoluminescence (PL) spectra were measured by a spectrofluorophotometer (Fluoromax-4, Horiba, Japan) under the excitation of 375 nm at room temperature to evaluate the ability of photogenerated carriers.

## Experiment S3

### Electrochemical and photoelectrochemical measurements.

Photoelectrochemical experiments were carried out by an electrochemical analyzer (Autolab RDE-2, Metrohm, Switzerland) in a standard three-electrode system using the samples as the working electrodes, Ag/AgCl as a reference electrode and the Pt wire as the counter electrode. The transient photocurrent (TPC) measurements were tested under visible light irradiation ( $\lambda \geq 420$  nm) with on/off switches at a bias of 0.2 V (vs. Ag/AgCl). The electrochemical impedance spectra (EIS) experiments were performed at an amplitude of 0.01 V (vs. Ag/AgCl) and over the frequency ranges from 100 kHz to 0.1 Hz under visible light irradiation ( $\lambda \geq 420$  nm). The Mott-Schottky plots were recorded over the AC frequencies of 500, 800 and 1000 Hz in the dark. The electrolyte in all the electrochemical measurements was 0.5 M Na<sub>2</sub>SO<sub>4</sub> aqueous solution. Before the preparation of working electrodes, all the FTO glass plates (1 cm × 2.5 cm) were washed with acetone, de-ionized water and ethanol, respectively, by ultrasonication for 30 min. The working electrodes of Mo<sub>2</sub>C MXene and CZS/Mo<sub>2</sub>C samples were prepared as follows: 10 mg of as-prepared samples were dispersed in mixture (400  $\mu$ L de-ionized water, 100  $\mu$ L ethanol, 100  $\mu$ L Nafion for MXenes and 500  $\mu$ L ethanol, 100  $\mu$ L Nafion for CZS/Mo<sub>2</sub>C samples), followed by ultrasonication for 2 h to make uniform slurries. Thereafter, 100  $\mu$ L of the slurry was coated onto a FTO glass plate and dried in air for whole night. The work area of the working electrode immersed in the electrolyte was 1 cm<sup>2</sup>.

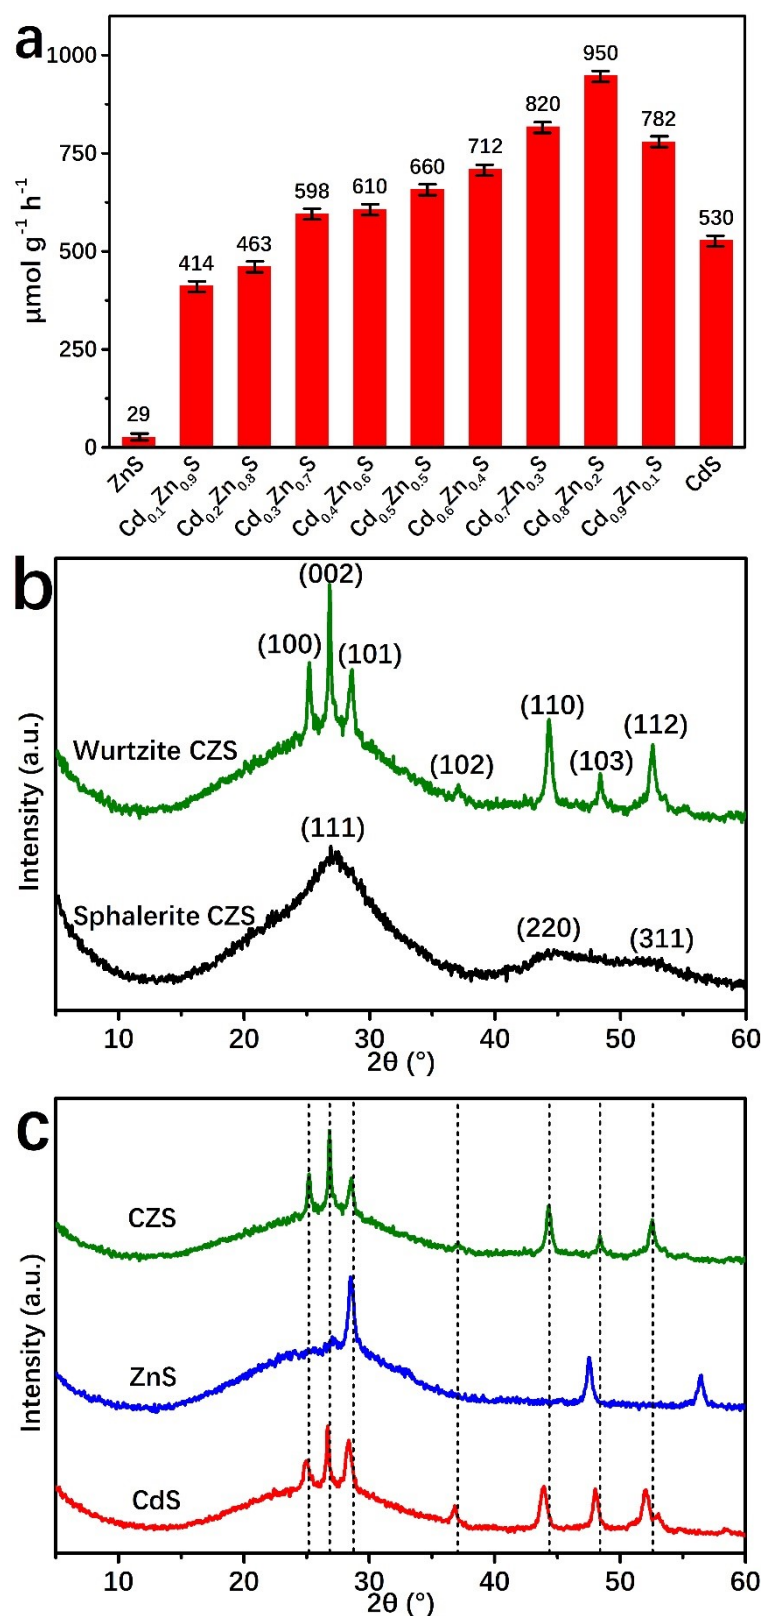

**Fig. S1** (a) The photocatalytic activities of  $\text{Cd}_x\text{Zn}_{1-x}\text{S}$  samples before hydrothermal treatments under visible-light illumination. XRD patterns of (b)  $\text{Cd}_{0.8}\text{Zn}_{0.2}\text{S}$  before (black pattern) and after (green pattern) hydrothermal treatments, (c) pure CdS, ZnS and  $\text{Cd}_{0.8}\text{Zn}_{0.2}\text{S}$  after hydrothermal treatments. The dotted lines in (c) display the position of peaks of  $\text{Cd}_{0.8}\text{Zn}_{0.2}\text{S}$ .

As shown in Fig. S1b, the main crystal composition of  $\text{Cd}_{0.8}\text{Zn}_{0.2}\text{S}$  is sphalerite phase because the starting materials are used for chemical reaction at room temperature. After hydrothermal treatment in ethylenediamine, the (111) peak of sphalerite  $\text{Cd}_{0.8}\text{Zn}_{0.2}\text{S}$ <sup>1</sup> transformed into one sharp and intense (002) peak with two shoulder peaks at 25.2 and 28.6°, which implied the highly crystalline nature. These arisen diffraction peaks, also including the peaks from 45 to 53°, distinctly reveal that the conversion of crystal phase (from sphalerite to wurtzite) can be achieved by the method mentioned in this paper. Since the Cd content in  $\text{Cd}_{0.8}\text{Zn}_{0.2}\text{S}$  is dominant, compared with pure CdS synthesized in this paper after hydrothermal treatment in Fig. S1c, all the characteristic peaks of  $\text{Cd}_{0.8}\text{Zn}_{0.2}\text{S}$  show a slight shift toward higher degrees with a decreased interplanar spacing, which is attributed to  $\text{Zn}^{2+}$  ions doping into CdS and the formation of solid solution.<sup>2</sup>

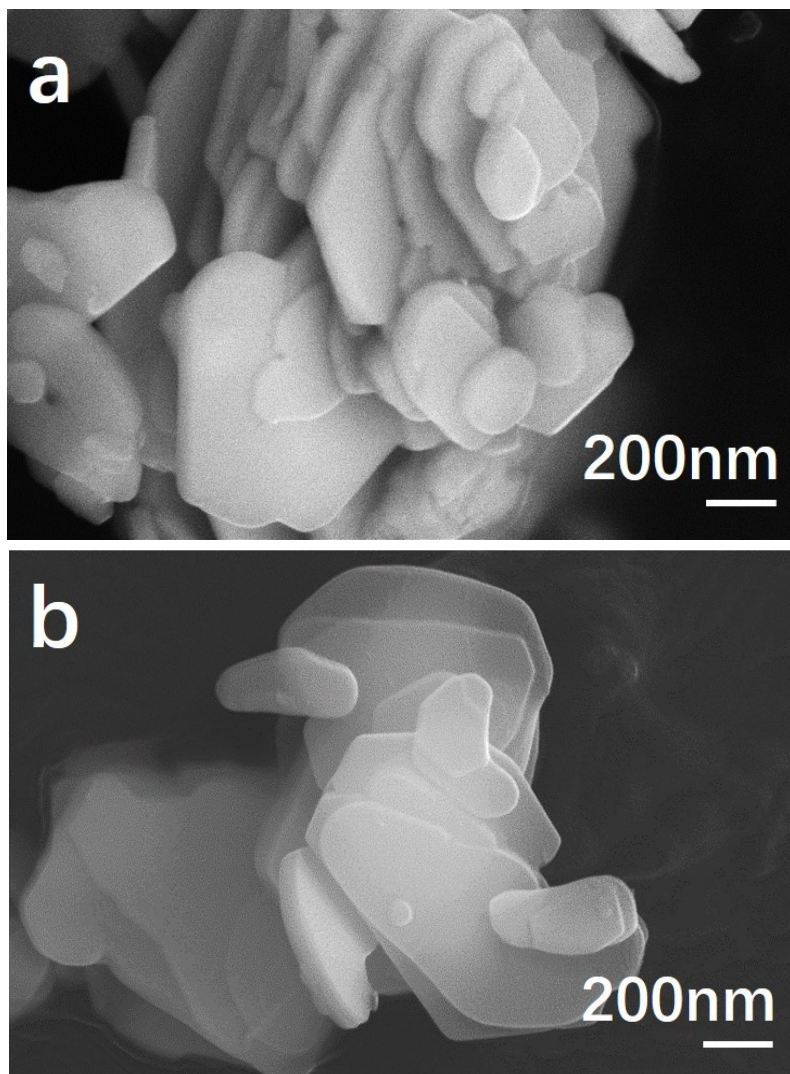

**Fig. S2** SEM images of (a) raw  $\text{Mo}_2\text{Ga}_2\text{C}$  and (b)  $\text{Mo}_2\text{C}$  MXene prepared by common etching method.

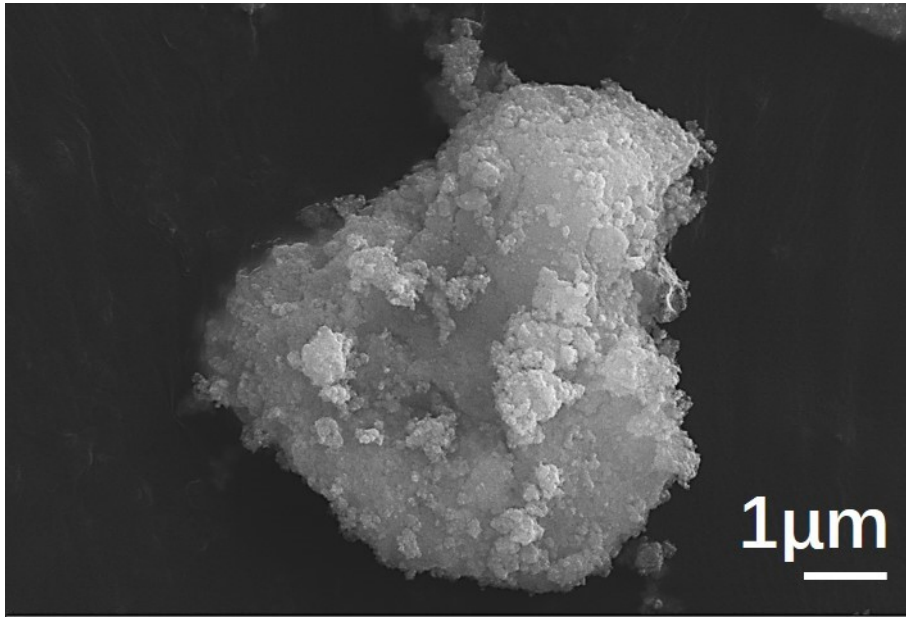

**Fig. S3** SEM image of sphalerite CZSMx sample.



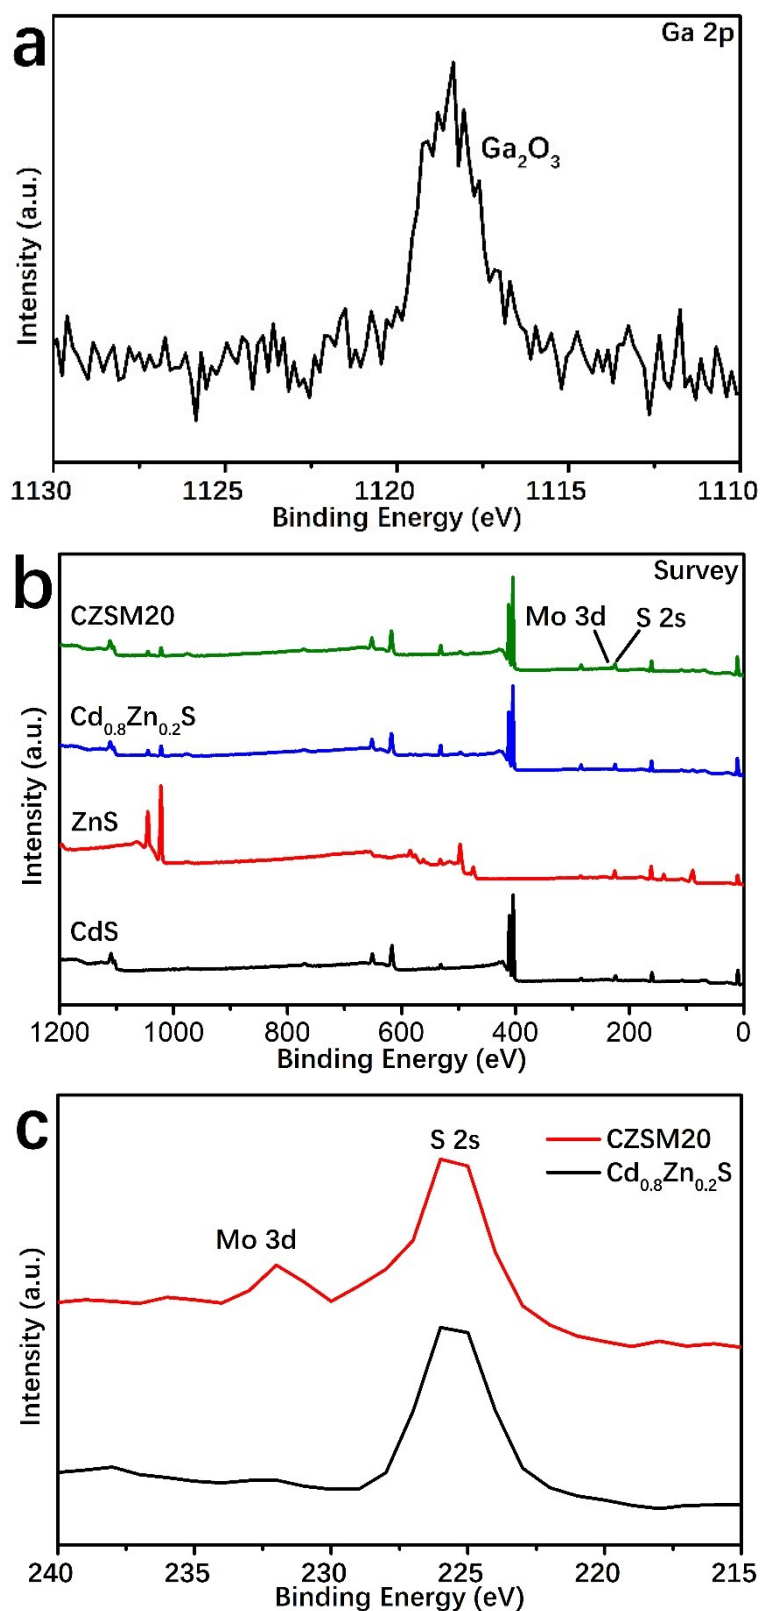

**Fig. S4** (a) High resolution XPS spectrum of Ga 2p region for  $\text{Mo}_2\text{C}$ -CTAB. (b) The full-scale XPS spectra of CdS, ZnS and  $\text{Cd}_{0.8}\text{Zn}_{0.2}\text{S}$  before and after coupling with  $\text{Mo}_2\text{C}$ -CTAB. (c) The survey spectra of  $\text{Cd}_{0.8}\text{Zn}_{0.2}\text{S}$  and CZSM20 focusing on the binding energy range from 215 to 240 eV, showing the existence of peak of Mo 3d.

## Supplementary Note 1

### The discussion about the negligible existence of $\text{Ga}_2\text{O}_3$ in $\text{Mo}_2\text{C}$ -CTAB.

At the beginning of synthesizing  $\text{Mo}_2\text{Ga}_2\text{C}$ ,  $\beta\text{-Mo}_2\text{C}$  powders were mixed with molten Ga in air. The vacuum-sealing process may not be perfect during heating the starting materials at high temperature. Besides, some characterization processes, such as XRD, were also handled in air. As a result, the inevitable contacting with air leads to the generation of  $\text{Ga}_2\text{O}_3$ , thereby coexisting with  $\text{Mo}_2\text{Ga}_2\text{C}$ . Similar phenomenon can be found in the preparation of  $\text{Ti}_3\text{AlC}_2$  with negligible  $\text{Al}_2\text{O}_3$  impurity.<sup>3</sup> The formed  $\text{Ga}_2\text{O}_3$  has more chemical stability than Ga in acid solution, resulting in incomplete removal of  $\text{Ga}_2\text{O}_3$  during etching process. Therefore, a little  $\text{Ga}_2\text{O}_3$  coexist with  $\text{Mo}_2\text{C}$ -CTAB during the subsequent experiments.

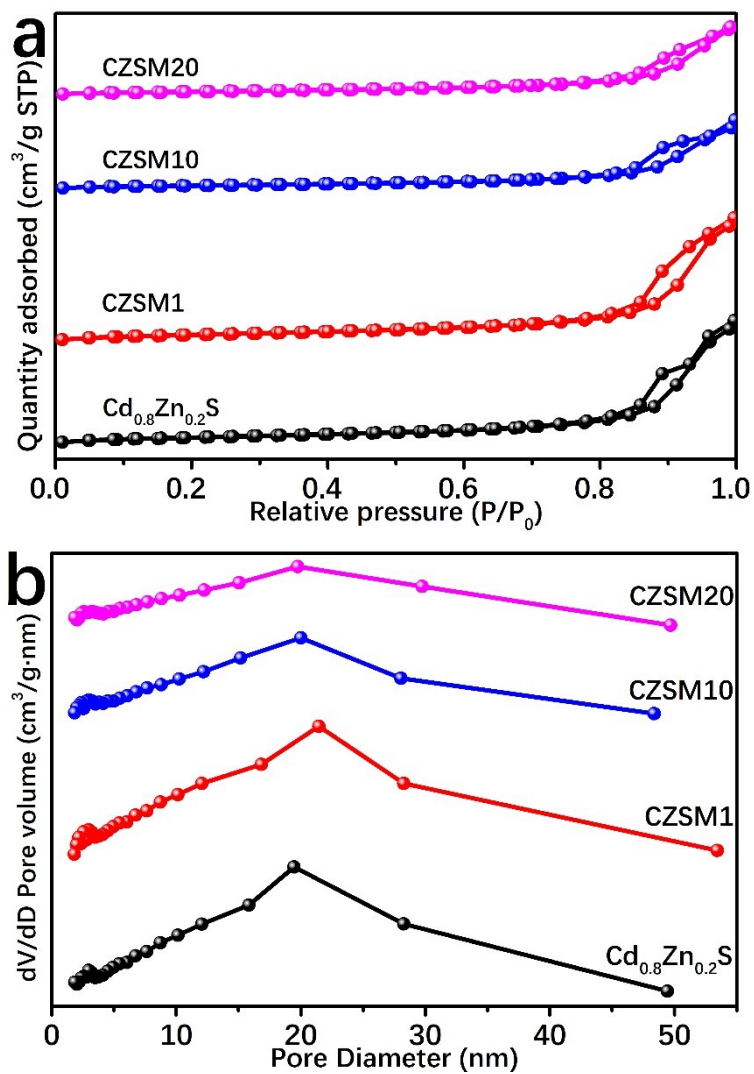

**Fig. S5**  $\text{N}_2$  adsorption-desorption isotherms (a) and pore size distribution curves (b) of  $\text{Cd}_{0.8}\text{Zn}_{0.2}\text{S}$ , CZSM1, CZSM10 and CZSM20.

**Tab. S1** SSA, pore volume and average pore diameter of samples.

| <b>Samples</b>                        | <b>SSA<br/>(m<sup>2</sup> g<sup>-1</sup>)</b> | <b>Pore Volume<br/>(cm<sup>3</sup> g<sup>-1</sup>)</b> | <b>Average pore<br/>diameter<br/>(nm)</b> |
|---------------------------------------|-----------------------------------------------|--------------------------------------------------------|-------------------------------------------|
| Cd <sub>0.8</sub> Zn <sub>0.2</sub> S | 45.5                                          | 0.18                                                   | 17.0                                      |
| CZSM1                                 | 45.1                                          | 0.18                                                   | 16.9                                      |
| CZSM2.5                               | 40.0                                          | 0.16                                                   | 17.9                                      |
| CZSM5                                 | 40.7                                          | 0.15                                                   | 16.7                                      |
| CZSM10                                | 37.6                                          | 0.15                                                   | 16.4                                      |
| CZSM15                                | 40.6                                          | 0.16                                                   | 15.7                                      |
| CZSM20                                | 38.2                                          | 0.15                                                   | 16.9                                      |
| CZSM25                                | 38.0                                          | 0.15                                                   | 16.0                                      |

**Tab. S2** Comparison of AQE values of samples.

| <b>Samples</b>                        | <b>AQE values (%)</b> |
|---------------------------------------|-----------------------|
| Cd <sub>0.8</sub> Zn <sub>0.2</sub> S | 2.5                   |
| CZSM1                                 | 9.1                   |
| CZSM2.5                               | 10.3                  |
| CZSM5                                 | 13.8                  |
| CZSM10                                | 15.6                  |
| CZSM15                                | 19.8                  |
| CZSM20                                | 22.5                  |
| CZSM25                                | 20.6                  |

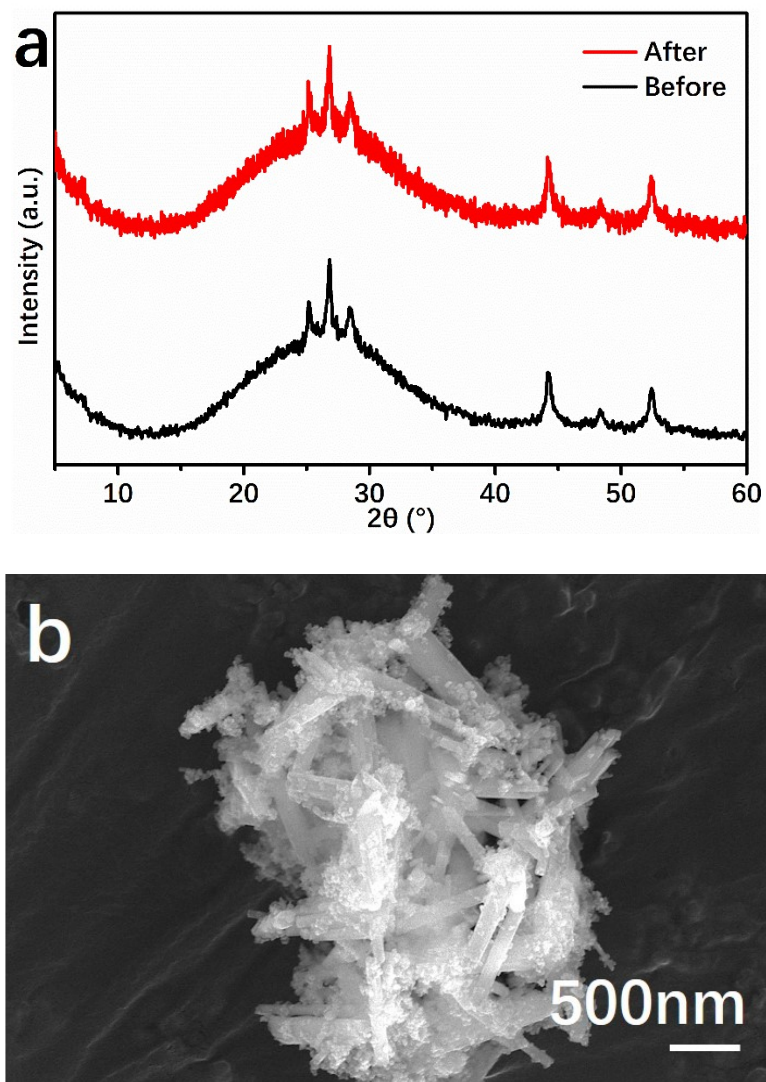

**Fig. S6** (a) XRD patterns of CZSM20 before and after cycling tests. (b) SEM image of CZSM20 after cycling test.

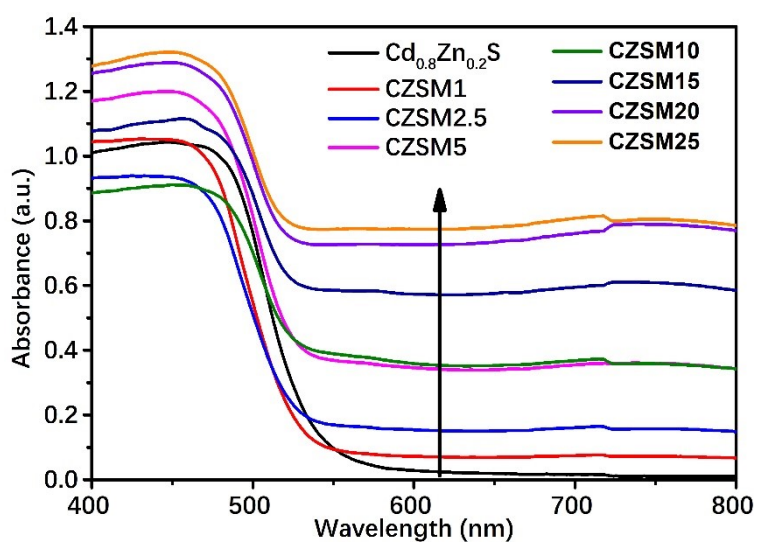

**Fig. S7** The UV-Vis diffuse reflectance spectra of CZSMx samples.

**Tab. S3** Comparison of PL decay time ( $\tau$ ) and the corresponding relative amplitude ( $f$ ) of  $\text{Cd}_{0.8}\text{Zn}_{0.2}\text{S}$  and CZSM20 tested by time-resolved PL spectroscopy.

| Samples                                  | Decay time (ns) |          | Relative amplitude (%) |       | Average lifetime ( $\tau$ , ns)* | $\chi^2$ |
|------------------------------------------|-----------------|----------|------------------------|-------|----------------------------------|----------|
|                                          | $\tau_1$        | $\tau_2$ | $f_1$                  | $f_2$ |                                  |          |
| $\text{Cd}_{0.8}\text{Zn}_{0.2}\text{S}$ | 1.0457          | 5.4716   | 39.15                  | 60.85 | 3.73                             | 1.2832   |
| CZSM20                                   | 1.9630          | 8.1575   | 47.02                  | 52.98 | 5.24                             | 1.2277   |

\* The average lifetime of carriers is calculated by the equation:  $\tau = \tau_1 f_1 + \tau_2 f_2$

$\chi^2$ : The goodness of fit parameter.

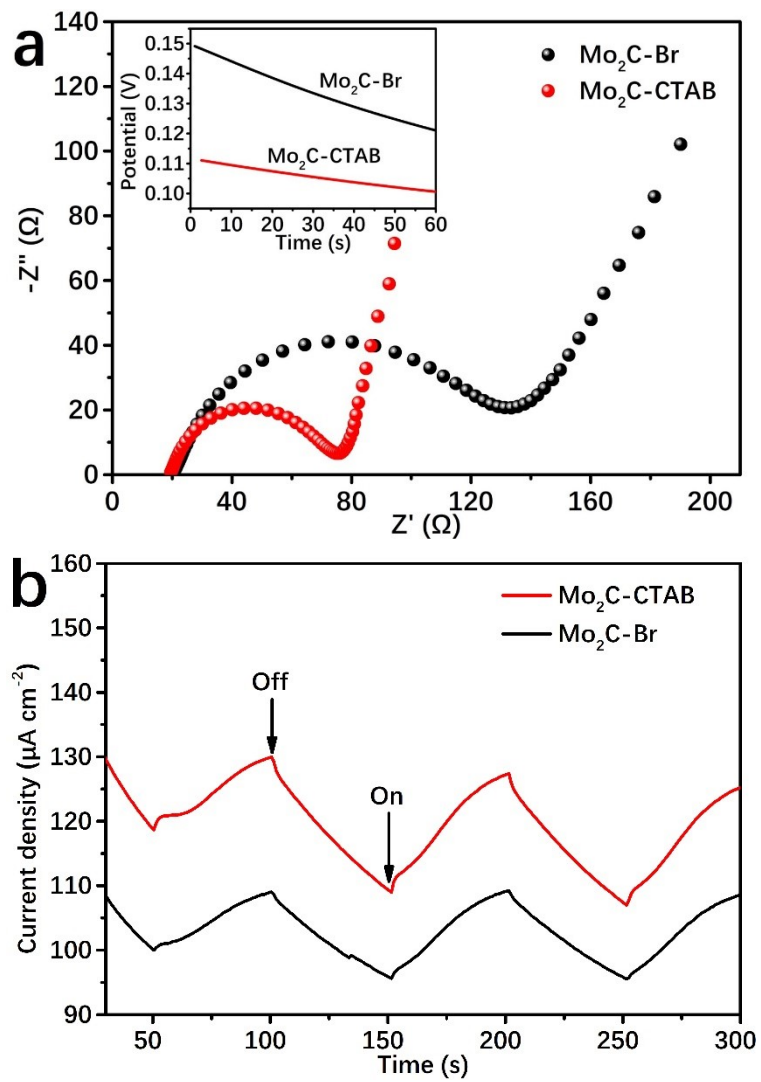

**Fig. S8** Nyquist plots (a) and TPC responses (b) of Mo<sub>2</sub>C-CTAB and Mo<sub>2</sub>C-Br. The inset in (a) is their OCP versus time curves.

## Supplementary Note 2

### Analysis of photoelectrodes kinetic properties of MXenes.

EIS was used to check the kinetic properties of Mo<sub>2</sub>C-CTAB and Mo<sub>2</sub>C-Br on as-prepared photoelectrodes over different frequency of AC voltage. Fig. S7a compares the Nyquist plots of two MXenes as electrode materials. The two plots are composed of a semicircle with large curvature in high and medium frequency regions, while a linear tendency in low frequency regions. It can be seen clearly that Mo<sub>2</sub>C-CTAB has a smaller diameter of semicircle than that of Mo<sub>2</sub>C-Br, which distinctly reveals that Mo<sub>2</sub>C MXene etched by CTAB possesses better charge-transfer efficiency with weak transfer impedance as compared to Mo<sub>2</sub>C MXene prepared by NH<sub>4</sub>Br. In general, the changing process of open circuit potential (OCP) versus time reflects the status of the electrode from instability to stability. From the OCP curves in the inset (Fig. S7a), Mo<sub>2</sub>C-CTAB has a smaller slope, indicating the photoelectrode of Mo<sub>2</sub>C-CTAB can faster achieve the stability in the same time and the variation range of OCP value of Mo<sub>2</sub>C-CTAB is smaller. The Warburg impedance,<sup>4</sup> displayed in the low frequency region, can reflect the solid-state diffusion ability of carriers in the bulk materials. As shown in Fig. S7a, the Mo<sub>2</sub>C-CTAB photoelectrode exhibits a Warburg impedance that is almost perpendicular to the x axis, suggesting that the interlayer spacing of Mo<sub>2</sub>C flakes connected by CTA<sup>+</sup> is beneficial to the diffusion and transfer of photogenerated carriers between the layers.



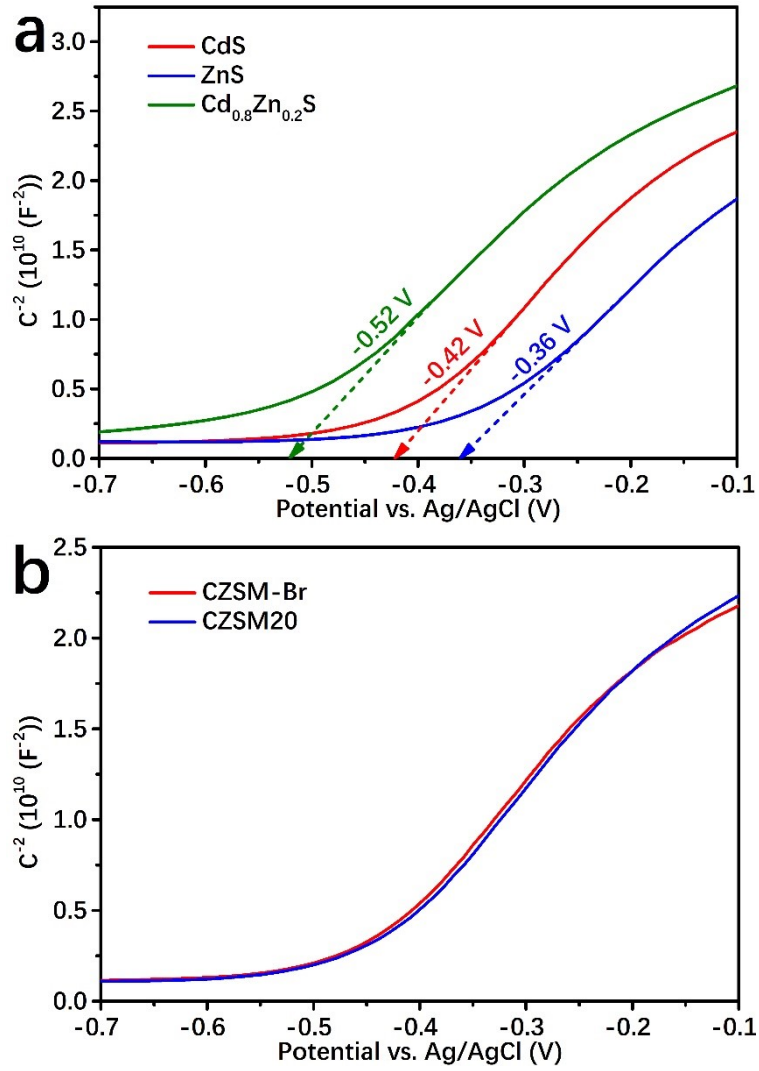

**Fig. S9** Mott-Schottky plots of: (a) pure CdS, ZnS and Cd<sub>0.8</sub>Zn<sub>0.2</sub>S, (b) CZSM20 and CZSM-Br. All these Mott-Schottky values were tested over AC frequency of 1000 Hz.

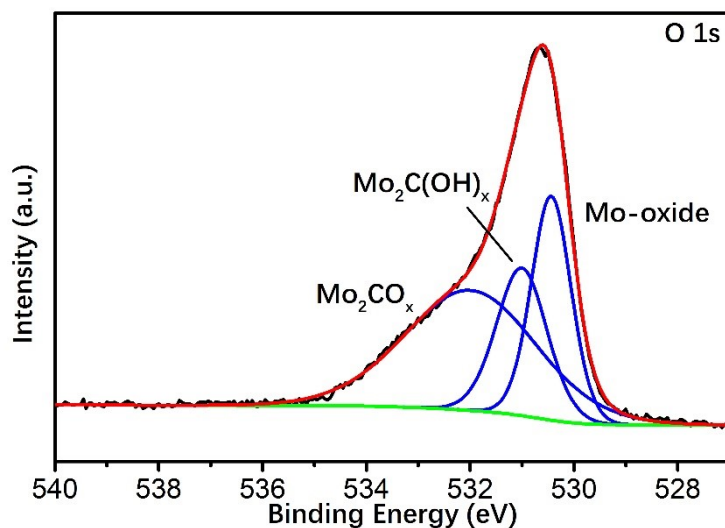

**Fig. S10** The XPS spectrum of Mo<sub>2</sub>C-CTAB for O 1s.

### Supplementary Note 3

#### Discussion of the Fermi level of Mo<sub>2</sub>C-CTAB.

According to the previous theoretical calculation,<sup>5</sup> the Fermi level of O-terminated Mo<sub>2</sub>C MXene is calculated to be 1.09 V vs. NHE. To check the -O content on the surface of Mo<sub>2</sub>C-CTAB, the high-resolution XPS spectrum in O 1s region was tested and shown in Fig. S10. The peaks at 531.0 and 532.0 eV can be assigned, respectively, to Mo<sub>2</sub>C(OH)<sub>x</sub> (OH-termination) and Mo<sub>2</sub>CO<sub>x</sub> (O-termination).<sup>6</sup> It is worth noting that only ~20 at.% of -OH species in O 1s region was detected, indicating most O-terminations was converted from OH-terminations by losing the H<sup>+</sup> during etching process and more CTA<sup>+</sup> could be adsorbed in the interlayer spacing. Thus O-terminated Mo<sub>2</sub>C-CTAB is electronegative. Moreover, considering the weak signal of C-Mo-Br species in Fig. 4b, it can be concluded that the hydrothermal etching strategy in this paper made an instability of -Br or -Cl, which were easily replaced by -O or -OH. Therefore, the surface of Mo<sub>2</sub>C-CTAB is mainly terminated by -O and a little -OH/Br/Cl, and the Fermi level of Mo<sub>2</sub>C-CTAB can be approximatively regarded as 1.09 V vs. NHE.

**Tab. S4** Comparison of the photocatalytic H<sub>2</sub> production performance under visible-light of CZS/Mo<sub>2</sub>C and other state-of-the-art CZS-based photocatalysts previously reported.

| Photocatalyst                                       | Catalyst amount (mg) | Sacrificial agent                                  | Optimum co-catalyst loading | Light intensity (mW/cm <sup>2</sup> ) | H <sub>2</sub> -rate (mmol g <sup>-1</sup> h <sup>-1</sup> ) | Ref.      |
|-----------------------------------------------------|----------------------|----------------------------------------------------|-----------------------------|---------------------------------------|--------------------------------------------------------------|-----------|
| CZS/Mo <sub>2</sub> C                               | 20                   | Lactic acid                                        | 20 wt.%                     | 80                                    | 44.19                                                        | This work |
| CZS/Ti <sub>3</sub> C <sub>2</sub>                  | 10                   | Na <sub>2</sub> SO <sub>3</sub> /Na <sub>2</sub> S | 1 wt.%                      | N/A                                   | 15.0                                                         | 7         |
| CdS/Ti <sub>3</sub> C <sub>2</sub>                  | 20                   | Lactic acid                                        | 2.5 wt.%                    | 80                                    | 14.3                                                         | 8         |
| MoS <sub>2</sub> /Ti <sub>3</sub> C <sub>2</sub>    | 30                   | Methanol                                           | 30 wt.%                     | N/A                                   | 6.1                                                          | 9         |
| Nb <sub>2</sub> C/Nb <sub>2</sub> O <sub>5</sub> /C | 40                   | Methanol                                           | 51 mol.%                    | 120                                   | 0.007                                                        | 10        |
| CdS/Nb <sub>2</sub> C                               | 10                   | Lactic acid                                        | 15 wt.%                     | N/A                                   | 5.0                                                          | 11        |
| g-C <sub>3</sub> N <sub>4</sub> /Ti <sub>2</sub> C  | 50                   | Triethanolamine                                    | 0.4 wt.%                    | N/A                                   | 0.95                                                         | 12        |
| CZS/g-C <sub>3</sub> N <sub>4</sub>                 | 20                   | Na <sub>2</sub> SO <sub>3</sub> /Na <sub>2</sub> S | 32 wt.%                     | 1.5                                   | 33.4                                                         | 13        |
| CZS/CoFe <sub>2</sub> O <sub>4</sub>                | 100                  | Na <sub>2</sub> SO <sub>3</sub> /Na <sub>2</sub> S | 7 wt.%                      | 48.9                                  | 0.35                                                         | 14        |
| CZS/Ni <sub>2</sub> P                               | 50                   | Na <sub>2</sub> SO <sub>3</sub> /Na <sub>2</sub> S | 0.3 mol%                    | 100                                   | 41.2                                                         | 15        |
| CZS/SrTiO <sub>3</sub>                              | 50                   | Na <sub>2</sub> SO <sub>3</sub> /Na <sub>2</sub> S | N/A                         | 150                                   | 25.0                                                         | 16        |
| CZS/NiB                                             | 6.6                  | Lactic acid                                        | 15 wt.%                     | N/A                                   | 8.1                                                          | 17        |
| CZS/La                                              | N/A                  | Na <sub>2</sub> SO <sub>3</sub> /Na <sub>2</sub> S | 2 wt.%                      | N/A                                   | 1.39                                                         | 18        |
| CZS-P/Pt-PdS                                        | 10                   | Na <sub>2</sub> SO <sub>3</sub> /Na <sub>2</sub> S | N/A                         | 100                                   | 7.1                                                          | 19        |

## Supplementary References

- 1 Z. H. Han, G. Chen, C. M. Li, Y. G. Yu and Y. S. Zhou, *J. Mater. Chem. A*, 2015, **3**, 1696-1702.
- 2 X. Zhang, Z. Zhao, W. Zhang, G. Zhang, D. Qu, X. Miao, S. Sun and Z. Sun, *Small*, 2016, **12**, 793-801.
- 3 N. V. Tzenov and M. W. Barsoum, *J. Am. Ceram. Soc.*, 2000, **83**, 825-832.
- 4 G. Barbero and I. Lelidis, *Phys. Chem. Chem. Phys.*, 2017, **19**, 24934-24944.
- 5 S. Jin, Z. Shi, H. Jing, L. Wang, Q. Hu, D. Chen, N. Li and A. Zhou, *ACS Appl. Energy Mater.*, 2021, **4**, 12754-12766.
- 6 J. Halim, K. M. Cook, M. Naguib, P. Eklund, Y. Gogotsi, J. Rosen and M. W. Barsoum, *Appl. Surf. Sci.*, 2016, **362**, 406-417.
- 7 S. Zheng, S. Peng, Z. Wang, J. Huang, X. Luo, L. Han and X. Li, *Ceram. Int.*, 2021, **47**, 28304-28311.
- 8 J. R. Ran, G. P. Gao, F. T. Li, T. Y. Ma, A. J. Du and S. Z. Qiao, *Nat. Commun.*, 2017, **8**, 13907.
- 9 J. Zhang, C. Xing and F. Shi, *Int. J. Hydrogen. Energ.*, 2020, **45**, 6291-6301.
- 10 T. M. Su, R. Peng, Z. D. Hood, M. Naguib, I. N. Ivanov, J. K. Keum, Z. Z. Qin, Z. H. Guo and Z. L. Wu, *Chemsuschem*, 2018, **11**, 688-699.
- 11 J. Huang, M. Wang, X. Zhang, J. Tao, L. Lu, G. Qiao and G. Liu, *J. Alloy. Compd.*, 2022, **923**, 166256.
- 12 M. M. Shao, Y. F. Shao, J. W. Chai, Y. J. Qu, M. Y. Yang, Z. L. Wang, M. Yang, W. F. Ip, C. T. Kwok, X. Q. Shi, Z. G. Lu, S. J. Wang, X. S. Wang and H. Pan, *J. Mater. Chem. A*, 2017, **5**, 16748-16756.
- 13 L. Yao, D. Wei, Y. Ni, D. Yan and C. Hu, *Nano Energy*, 2016, **26**, 248-256.
- 14 Z. Shao, T. Zeng, Y. He, D. Zhang and X. Pu, *Chem. Eng. J.*, 2019, **359**, 485-495.
- 15 T. Yu, Y. Si, Z. Lv, K. Wang, Q. Zhang, X. Liu, G. Wang, G. Xie and L. Jiang, *Int. J. Hydrogen. Energ.*, 2019, **44**, 31832-31840.
- 16 T. Yu, Z. Lv, K. Wang, K. Sun, X. Liu, G. Wang, L. Jiang and G. Xie, *J. Power*

*Sources*, 2019, **438**, 227014.

17 L. Song, S. Zhang, D. Liu, S. Sun and J. Wei, *Int. J. Hydrogen. Energ.*, 2020, **45**, 8234-8242.

18 Y. G. Yu, G. Chen, L. X. Hao, Y. S. Zhou, Y. Wang, J. Pei, J. X. Sun and Z. H. Han, *Chem. Commun.*, 2013, **49**, 10142-10144.

19 K. Khan, X. Tao, M. Shi, B. Zeng, Z. Feng, C. Li and R. Li, *Adv. Funct. Mater.*, 2020, **30**, 2003731.
